# Supplementary material for: Abundance and Distribution of Transposable Elements in Two Drosophila QTL Mapping Resources
Source: PubMed Central journal article supplement — Mol Biol Evol. 2013 Jul 24;30(10):2311–27. doi: 10.1093/molbev/mst129 (PMC3773372; doi:10.1093/molbev/mst129), 2013-07-24
Supplement: supp_mst129_Supp_Fig_1.pdf [file supp_mst129_Supp_Fig_1.pdf]

Supplementary Figure 1

1) Identify read-pairs where one read aligns uniquely to the genome and the other read aligns to a TE.

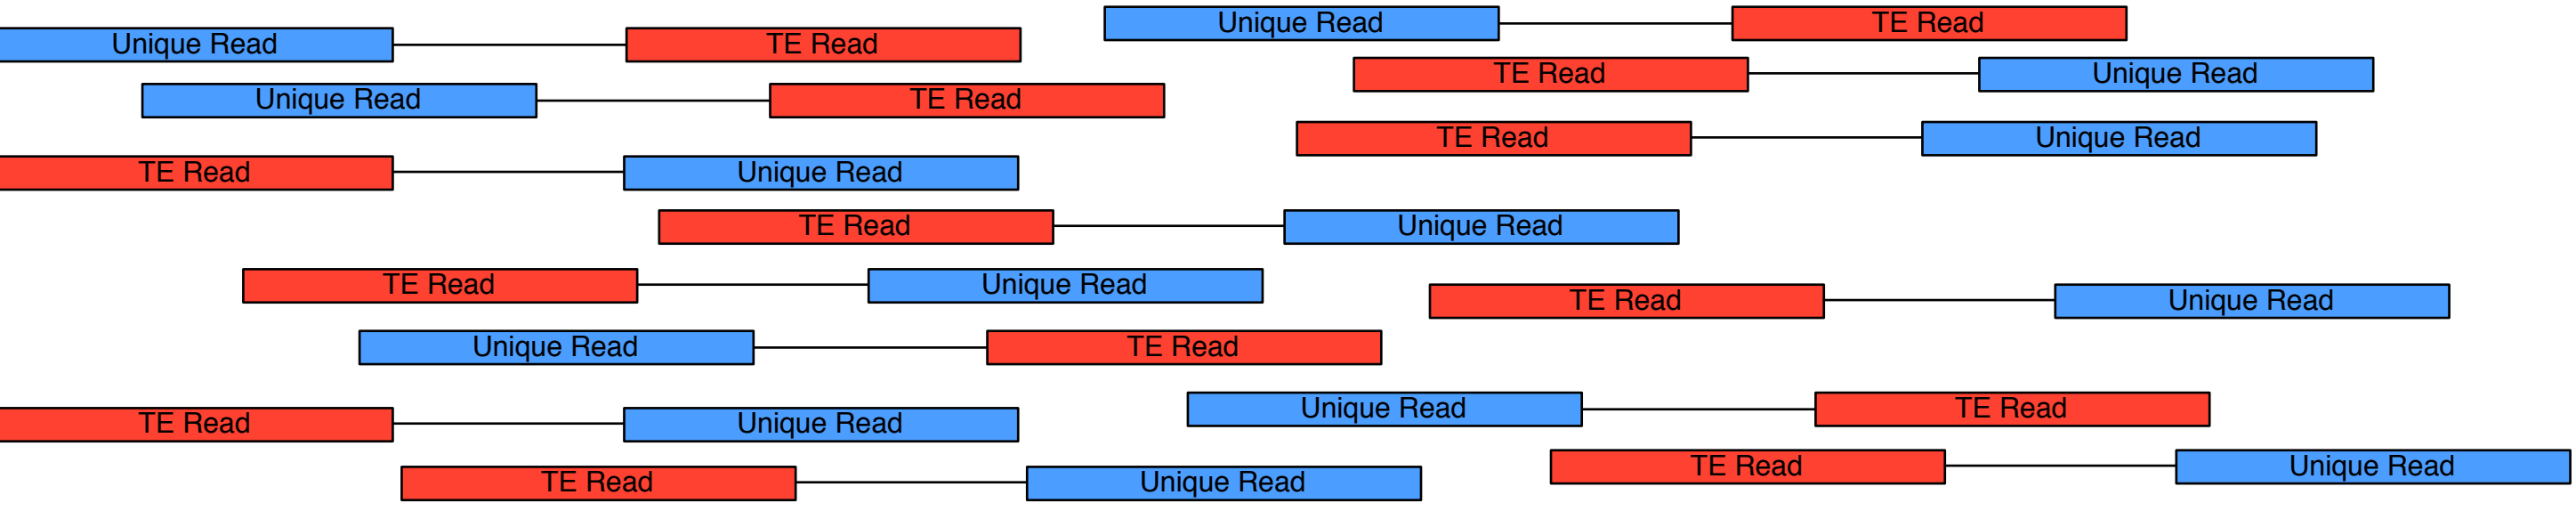

2) Cluster read pairs based on the alignment of the unique read.

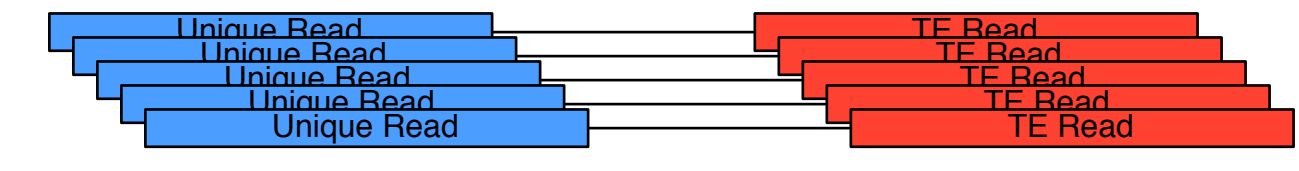

3) Join clusters where the unique reads are on the plus strand to clusters where the unique reads are on the minus strand to produce events.

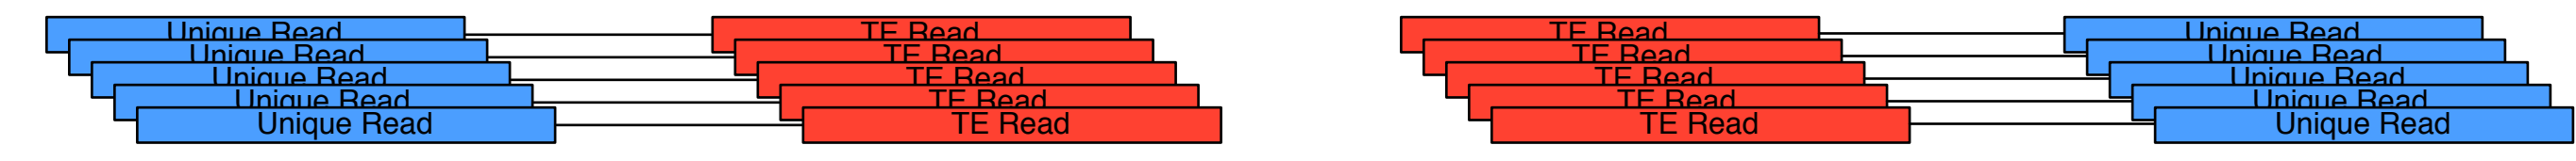

4) Identify additional reads that align near the clustered read pairs.

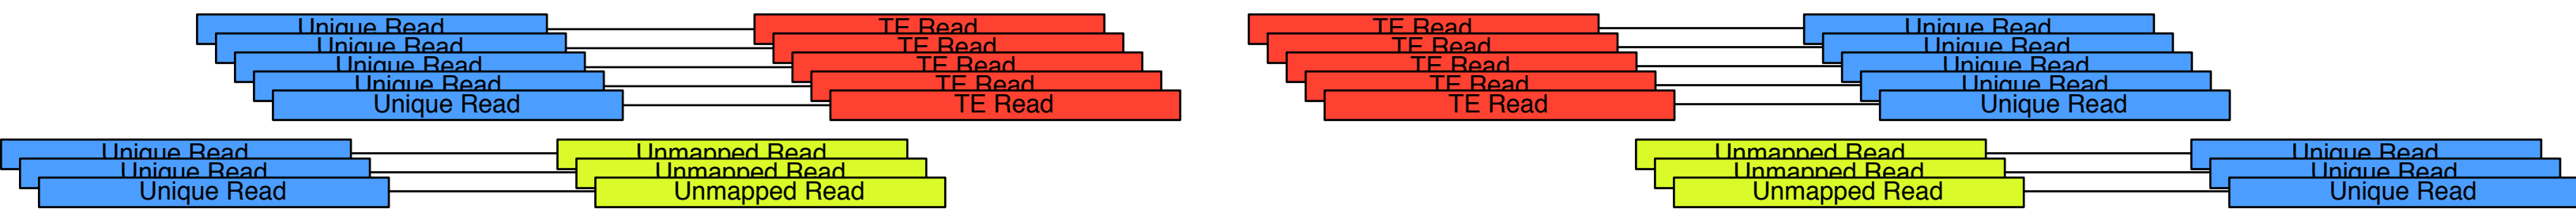

5) Run Phrap to generate contigs from reads.

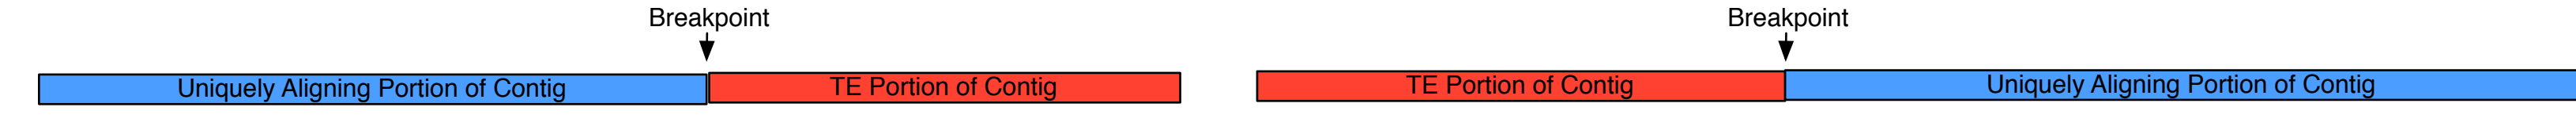

6) Generate a list of breakpoints identified in any line. Extract reads and construct contigs for each identified breakpoint in every line. Check contigs for evidence of a TE breakpoint or a contig that crosses the breakpoint indicating no TE insertion.

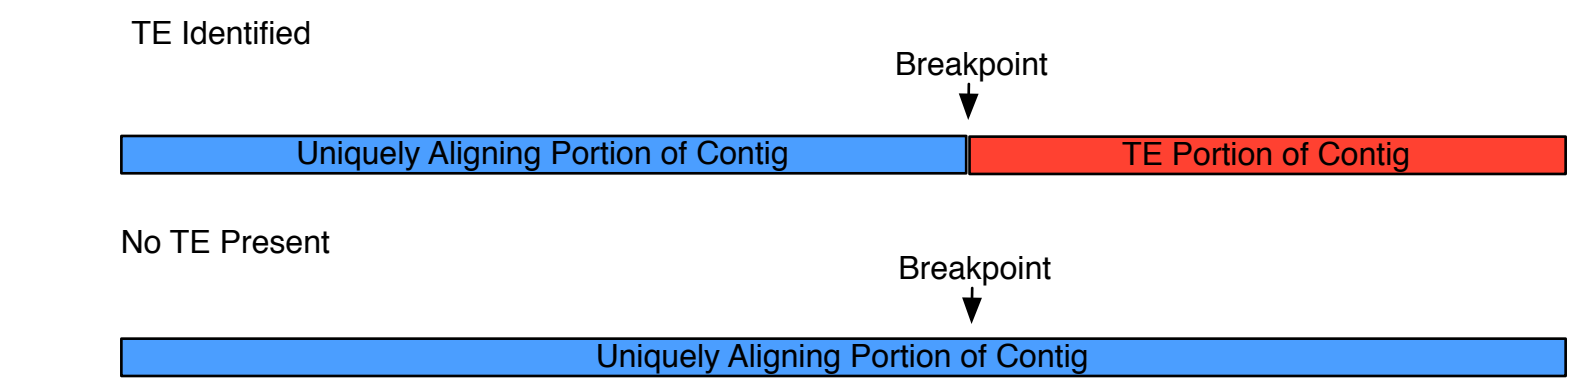

Supplementary Figure 2 : Number of TEs vs Intron size.

**DSPR**

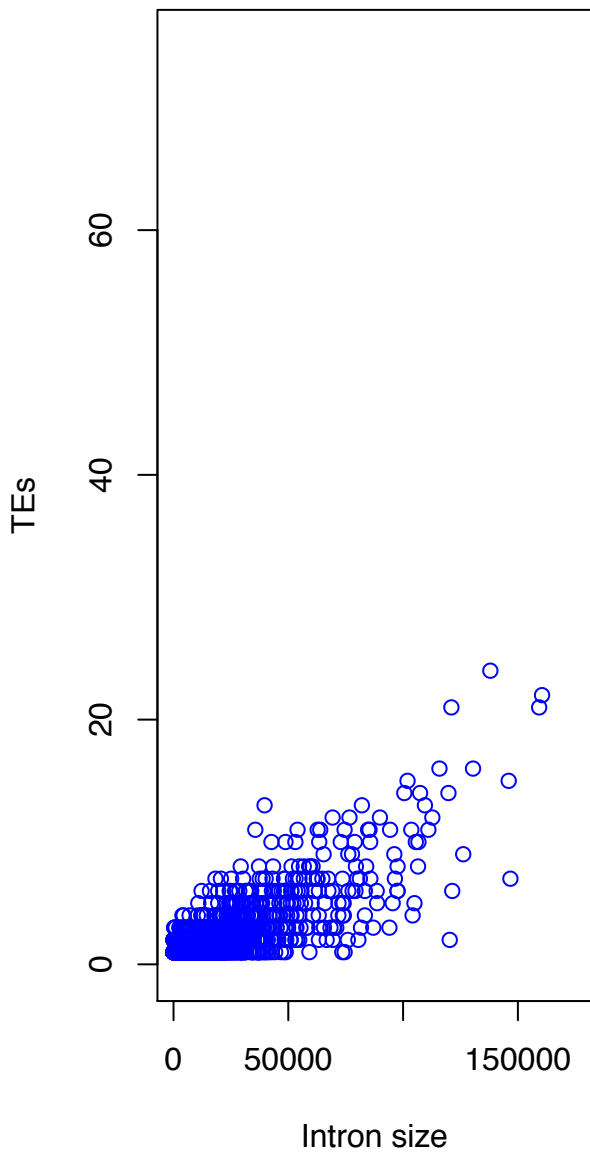

**DGRP**

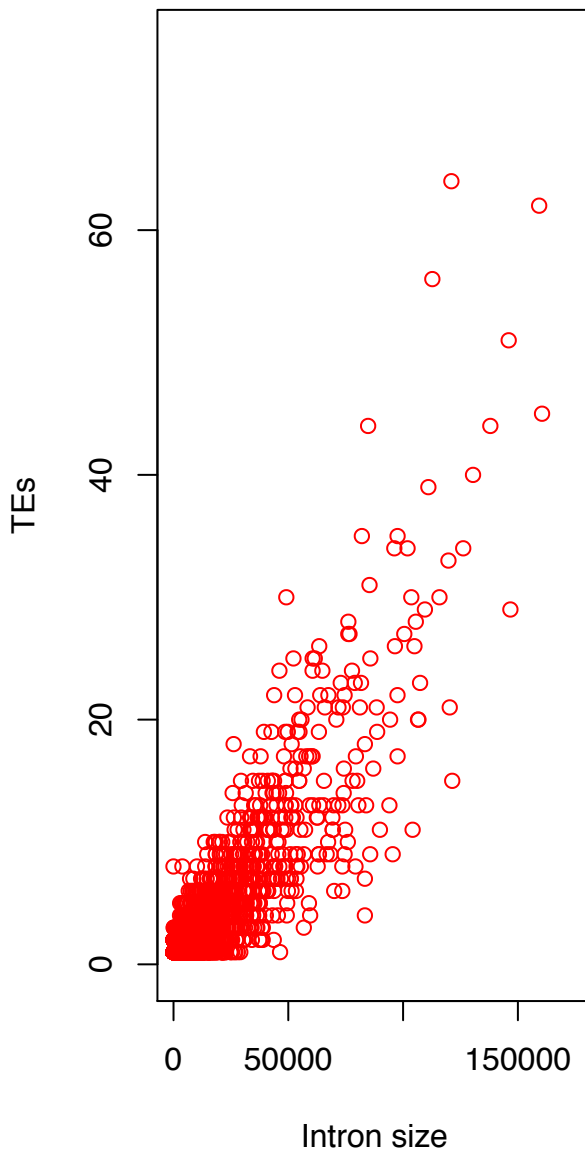

Supplementary Table 1: Included DGRP Lines

| Line    | Included | DGRP $\geq$ 25 |
|---------|----------|----------------|
| RAL-21  | Yes      | No             |
| RAL-26  | Yes      | No             |
| RAL-28  | No       | No             |
| RAL-38  | No       | No             |
| RAL-40  | Yes      | Yes            |
| RAL-41  | No       | No             |
| RAL-42  | Yes      | No             |
| RAL-45  | Yes      | No             |
| RAL-49  | Yes      | No             |
| RAL-57  | Yes      | Yes            |
| RAL-59  | Yes      | No             |
| RAL-69  | Yes      | No             |
| RAL-73  | Yes      | No             |
| RAL-75  | Yes      | No             |
| RAL-83  | Yes      | No             |
| RAL-85  | Yes      | No             |
| RAL-88  | Yes      | No             |
| RAL-91  | Yes      | No             |
| RAL-93  | Yes      | No             |
| RAL-101 | Yes      | No             |
| RAL-105 | Yes      | No             |
| RAL-109 | Yes      | No             |
| RAL-129 | Yes      | No             |
| RAL-136 | Yes      | No             |
| RAL-138 | No       | No             |
| RAL-142 | Yes      | No             |
| RAL-149 | Yes      | No             |
| RAL-153 | No       | No             |
| RAL-158 | Yes      | No             |
| RAL-161 | Yes      | No             |
| RAL-176 | Yes      | Yes            |
| RAL-177 | Yes      | Yes            |
| RAL-181 | Yes      | Yes            |
| RAL-195 | Yes      | No             |
| RAL-208 | Yes      | Yes            |
| RAL-217 | Yes      | No             |
| RAL-227 | Yes      | No             |
| RAL-228 | Yes      | No             |
| RAL-229 | Yes      | No             |
| RAL-233 | Yes      | No             |
| RAL-235 | Yes      | No             |
| RAL-237 | Yes      | No             |
| RAL-239 | Yes      | No             |
| RAL-256 | Yes      | No             |
| RAL-272 | No       | No             |
| RAL-280 | Yes      | No             |
| RAL-287 | Yes      | No             |
| RAL-309 | Yes      | No             |
| RAL-310 | Yes      | No             |
| RAL-313 | No       | No             |
| RAL-317 | Yes      | No             |
| RAL-318 | No       | No             |
| RAL-320 | Yes      | Yes            |
| RAL-321 | Yes      | Yes            |
| RAL-325 | No       | No             |
| RAL-332 | Yes      | Yes            |
| RAL-338 | Yes      | No             |
| RAL-350 | Yes      | No             |
| RAL-352 | No       | No             |
| RAL-356 | Yes      | No             |
| RAL-357 | Yes      | No             |
| RAL-358 | No       | No             |
| RAL-359 | Yes      | No             |
| RAL-362 | No       | No             |
| RAL-365 | Yes      | No             |
| RAL-367 | Yes      | No             |
| RAL-370 | Yes      | No             |
| RAL-371 | Yes      | No             |
| RAL-373 | Yes      | No             |
| RAL-374 | Yes      | No             |
| RAL-375 | Yes      | Yes            |
| RAL-377 | Yes      | No             |
| RAL-378 | Yes      | Yes            |
| RAL-379 | No       | No             |
| RAL-380 | Yes      | Yes            |
| RAL-381 | Yes      | Yes            |
| RAL-383 | Yes      | No             |
| RAL-386 | No       | No             |
| RAL-391 | Yes      | Yes            |
| RAL-392 | Yes      | No             |
| RAL-398 | No       | No             |
| RAL-399 | Yes      | No             |
| RAL-405 | Yes      | No             |
| RAL-406 | Yes      | Yes            |
| RAL-409 | Yes      | No             |
| RAL-426 | Yes      | No             |
| RAL-427 | Yes      | No             |
| RAL-437 | Yes      | No             |
| RAL-439 | No       | No             |
| RAL-440 | Yes      | No             |
| RAL-441 | Yes      | No             |
| RAL-443 | Yes      | Yes            |
| RAL-461 | No       | No             |
| RAL-491 | Yes      | No             |
| RAL-492 | Yes      | Yes            |
| RAL-502 | Yes      | Yes            |
| RAL-508 | Yes      | No             |
| RAL-509 | Yes      | No             |
| RAL-513 | Yes      | No             |
| RAL-517 | No       | No             |
| RAL-531 | Yes      | No             |
| RAL-535 | Yes      | No             |
| RAL-554 | No       | No             |
| RAL-555 | Yes      | No             |
| RAL-563 | Yes      | No             |
| RAL-589 | No       | No             |
| RAL-591 | No       | No             |
| RAL-595 | Yes      | No             |
| RAL-639 | Yes      | No             |
| RAL-642 | Yes      | No             |
| RAL-646 | Yes      | No             |
| RAL-703 | Yes      | No             |
| RAL-705 | Yes      | No             |
| RAL-707 | Yes      | No             |
| RAL-712 | No       | No             |
| RAL-714 | Yes      | No             |
| RAL-716 | Yes      | No             |
| RAL-721 | Yes      | No             |
| RAL-727 | Yes      | Yes            |
| RAL-730 | No       | No             |
| RAL-732 | Yes      | No             |
| RAL-737 | Yes      | Yes            |
| RAL-738 | Yes      | Yes            |
| RAL-757 | Yes      | Yes            |
| RAL-761 | Yes      | No             |
| RAL-765 | Yes      | No             |
| RAL-774 | Yes      | No             |
| RAL-776 | Yes      | No             |
| RAL-783 | No       | No             |
| RAL-786 | Yes      | No             |
| RAL-787 | Yes      | No             |
| RAL-790 | Yes      | No             |
| RAL-796 | Yes      | No             |
| RAL-799 | No       | No             |
| RAL-801 | No       | No             |
| RAL-802 | No       | No             |
| RAL-804 | Yes      | No             |
| RAL-805 | Yes      | No             |
| RAL-808 | Yes      | No             |
| RAL-810 | No       | No             |
| RAL-812 | Yes      | No             |
| RAL-818 | Yes      | No             |
| RAL-820 | Yes      | No             |
| RAL-822 | Yes      | No             |
| RAL-832 | No       | No             |
| RAL-837 | Yes      | No             |
| RAL-852 | Yes      | No             |
| RAL-855 | Yes      | No             |
| RAL-857 | Yes      | No             |
| RAL-859 | Yes      | No             |
| RAL-861 | No       | No             |
| RAL-879 | Yes      | No             |
| RAL-882 | No       | No             |
| RAL-884 | Yes      | No             |
| RAL-887 | Yes      | No             |
| RAL-890 | Yes      | No             |
| RAL-892 | Yes      | No             |
| RAL-894 | Yes      | No             |
| RAL-897 | Yes      | Yes            |
| RAL-907 | Yes      | No             |
| RAL-908 | Yes      | No             |
| RAL-911 | Yes      | No             |

Supplementary Table 2: PCR validation of a subset of TEs present in the *D. melanogaster* reference in nine of the DGRP lines.

| Line | Coverage | # of TE Present by PCR | Pipeline Agree | # of TE Absent by PCR | Pipeline Agree | Pipeline No Call | Total |
|------|----------|------------------------|----------------|-----------------------|----------------|------------------|-------|
| 375  | 38.1     | 47                     | 0.91           | 136                   | 0.96           | 0.02             | 187   |
| 555  | 21.6     | 46                     | 1.00           | 129                   | 0.98           | 0.06             | 186   |
| 639  | 19.4     | 51                     | 0.94           | 124                   | 1.00           | 0.07             | 188   |
| 705  | 18.9     | 44                     | 0.95           | 134                   | 0.98           | 0.06             | 189   |
| 707  | 20.5     | 46                     | 1.00           | 125                   | 0.99           | 0.08             | 185   |
| 714  | 20.0     | 52                     | 0.94           | 126                   | 0.99           | 0.06             | 189   |
| 732  | 18.9     | 45                     | 1.00           | 134                   | 0.99           | 0.04             | 187   |
| 765  | 19.7     | 46                     | 1.00           | 130                   | 0.99           | 0.07             | 189   |
| 820  | 17.0     | 46                     | 0.98           | 126                   | 0.99           | 0.08             | 187   |

Supplementary Table 3: TE presence and absence calls made by local reconstruction of TEs.

|        | Total   | Presence | Absence | No Call | % Calls |
|--------|---------|----------|---------|---------|---------|
| DGRP   | 2485070 | 52805    | 2361918 | 70216   | 97.17%  |
| DGRP25 | 143106  | 10753    | 132320  | 2724    | 99.98%  |
| DSRP   | 111300  | 10630    | 99270   | 1385    | 98.74%  |

Supplementary Table 6: Genes with different TE frequencies.

| FBgn        | Gene           | DSPR present | DSPR absent | DGRP present | DGRP absent | Bonferroni corrected p-value |
|-------------|----------------|--------------|-------------|--------------|-------------|------------------------------|
| FBgn0087007 | <i>bbg</i>     | 9            | 6           | 13           | 118         | 2.24E-005                    |
| FBgn0041092 | <i>tai</i>     | 9            | 6           | 14           | 117         | 3.52E-005                    |
| FBgn0024753 | <i>Flo-2</i>   | 10           | 5           | 19           | 112         | 3.42E-005                    |
| FBgn0037363 | <i>CG1347</i>  | 15           | 0           | 58           | 73          | 2.74E-005                    |
| FBgn0037295 | <i>dpr16</i>   | 15           | 0           | 55           | 76          | 6.80E-006                    |
| FBgn0259242 | <i>CG42340</i> | 12           | 3           | 21           | 110         | 8.18E-007                    |
| FBgn0051536 | <i>Cdep</i>    | 15           | 0           | 56           | 75          | 8.62E-006                    |
| FBgn0259152 | <i>Clbn</i>    | 11           | 4           | 13           | 118         | 2.14E-007                    |
| FBgn0086689 | <i>Hph</i>     | 15           | 0           | 54           | 77          | 5.34E-006                    |
| FBgn0000166 | <i>bcd</i>     | 10           | 5           | 8            | 123         | 1.12E-007                    |
| FBgn0031116 | <i>CG1695</i>  | 6            | 9           | 1            | 130         | 2.73E-006                    |
| FBgn0052817 | <i>CG32817</i> | 12           | 3           | 3            | 128         | 1.58E-012                    |
| FBgn0053202 | <i>dpr11</i>   | 7            | 8           | 5            | 126         | 1.62E-005                    |
| FBgn0030600 | <i>hiw</i>     | 6            | 9           | 1            | 130         | 2.73E-006                    |
| FBgn0003715 | <i>Tkr</i>     | 15           | 0           | 38           | 93          | 5.89E-008                    |
| FBgn0004370 | <i>Ptp10D</i>  | 12           | 3           | 20           | 111         | 5.34E-007                    |
| FBgn0083950 | <i>CG34114</i> | 9            | 6           | 7            | 124         | 6.65E-007                    |
| FBgn0011224 | <i>heph</i>    | 15           | 0           | 39           | 92          | 8.16E-008                    |
| FBgn0053507 | <i>dpr2</i>    | 10           | 5           | 9            | 122         | 2.29E-007                    |
| FBgn0037292 | <i>CG2022</i>  | 8            | 7           | 6            | 125         | 3.46E-006                    |
| FBgn0083949 | <i>CG34113</i> | 10           | 5           | 14           | 117         | 4.05E-006                    |
